# Supplementary material for: Three-dimensional cardiac computational modelling: methods, features and applications
Source: PubMed Central journal article supplement (PMC4424572; doi:10.1186/s12938-015-0033-5), 2015-04-17
Supplement: 12938_2015_33_MOESM1_ESM.pdf [file 12938_2015_33_MOESM1_ESM.pdf]

| MODEL                                  | Kind of model | Species (anatomy) | Model extension | Anatomical information     | Segmentation method           | Meshing                                                   | Fibre orientation | CCS                      | Endocardium detail | Other features | Model purpose | Online availability |
|----------------------------------------|---------------|-------------------|-----------------|----------------------------|-------------------------------|-----------------------------------------------------------|-------------------|--------------------------|--------------------|----------------|---------------|---------------------|
| Koushanpour & Collings, 1966 [1]       | Geom          | Rat, cat, turtle  | LV              | ExpM                       |                               |                                                           |                   |                          |                    |                | MA            |                     |
| Okajima <i>et al.</i> 1968 [8]         | Anat          | Human             | BV              | HS(3mm)                    | MD                            | vFEMh(3mm)                                                |                   | HPS, AK(Dog)             |                    |                | EP            |                     |
| Ghista & Sandler, 1969 [2]             | Geom          | Human             | LV              | VLV                        |                               |                                                           |                   |                          |                    |                | MA            |                     |
| Janz & Grimm, 1972 [3]                 | Geom          | Rat               | LV, FAn         | HS                         |                               | vFEMh(198el)                                              |                   |                          |                    |                | MA            |                     |
| Horan <i>et al.</i> 1978 [9]           | Anat          | Human             | LV              | HS(18)                     | MD                            | vFEMh(1675el,3.2mm)                                       |                   | AP, Dur                  |                    |                | EP            |                     |
| Miller & Geselowitz, 1978 [10]         | Anat          | Human             | BV              | HS(16,4.64mm)              | MD                            | CA(4000,3.75mm)                                           |                   |                          |                    |                | EP            |                     |
| Vinson <i>et al.</i> 1979 [185]        | Anat          | Human             | LV              | VLV                        | M                             | vFEMh(36el)                                               |                   |                          |                    |                | MA            |                     |
| Van den Broek, 1980 [4]                | Geom          | Rabbit            | LV              | ExpM, ML                   |                               |                                                           | RBM               |                          |                    |                | MA            |                     |
| Aoki <i>et al.</i> 1987 [14]           | Anat          | Human             | BV              | pHS(7)                     | M                             | CA(50e3,1.5mm)                                            |                   | HPS, Dur                 |                    |                | EP            |                     |
| Thakor & Eisenman, 1989 [15]           | Anat          | Dog               | BV              | pHS(1.5mm)                 | M                             | vFEMh(1473el)                                             |                   | Purk, AK                 |                    |                | EP            |                     |
| Nielsen <i>et al.</i> 1991 [12]        | Anat          | Dog               | BV              | ExpM                       |                               | vFEM-H(24el,41n)                                          | DExp(SH)          |                          | Pap                |                | MA, EP        | AMDB                |
| Creswell <i>et al.</i> 1992 [26]       | IM            | Dog               | BV              | iMRI(11,5mm)               | M                             | vFEMh(x)                                                  |                   |                          |                    |                |               |                     |
| Lorange & Gulrajani, 1993 [27]         | IM            | Human             | WH              | eCT(132)                   |                               | CA(25e4,1mm)                                              | Ventricles        | HPS, 1120-PMJ            |                    |                | EP            |                     |
| Colli Franzone <i>et al.</i> 1998 [5]  | Geom          |                   | LV              |                            |                               | vFEMh(x)                                                  | RBM               | AP, Dur                  |                    |                | EP            |                     |
| Vetter & McCulloch, 1998 [11]          | Anat          | Rabbit            | BV              | HS(2-3mm)                  |                               | vFEMx                                                     | DExp(SH)          |                          |                    |                | EM            | 1                   |
| Siregar <i>et al.</i> 1998 [18]        | CAD           | Human             | WH, GCV         | ML                         |                               | CA(x)                                                     | Lit               | AVN, HPS, Dur            |                    |                | EP            |                     |
| Yamaki <i>et al.</i> 1999 [186]        | Anat          | Human             | WH              |                            |                               | CA(50e3,1.5mm)                                            |                   | SAN, AVN, HPS, Dur       |                    | ISC            | EP            |                     |
| Freudenberg <i>et al.</i> 2000 [16]    | Anat          | Human             | WH              | pHS-VHP(1mm)               | SA2D: CTS                     | CA(x)                                                     |                   | SAN, AVN, HPS, AK(Human) | Pap                |                | EP            |                     |
| Harrild & Henriquez, 2000 [19]         | CAD           | Human             | A               | ML                         |                               | vFEMh(25e4el,0.55mm)                                      |                   | Atr                      | Pec, FO            |                | EP            |                     |
| Winslow <i>et al.</i> 2000 [28]        | IM            | Rabbit            | BV              | eMRI(128,469 μm)           | SA2D: SN                      | vFDG(x)                                                   | DTI(SH)           |                          |                    |                | EP            |                     |
| Blanc <i>et al.</i> 2001 [22]          | Geom          | Human             | A               | ML                         |                               | sFEMt(250e3n,0.2mm)                                       |                   |                          |                    |                | EP            |                     |
| Zemlin <i>et al.</i> 2001 [23]         | Anat          | Human             | A               | pHS-VHP(1mm)               | SA2D: CTS                     | sFEMt(6e5el,0.28mm)                                       | DExp(DH)          | Atr                      | Pec, CT            |                | EP            |                     |
| Schulte <i>et al.</i> 2001 [49]        | IM, PS, Def   | Human             | BV, FAn         | iMRI(5mm)                  | M                             | sFEM-H                                                    |                   |                          |                    |                | MBS           |                     |
| Virag <i>et al.</i> 2002 [29]          | IM, LD        | Human             | A               | xMRI                       | M                             | sFEMt(50-400e3n)                                          |                   |                          | FO                 |                | EP            |                     |
| Lorenzo-Valdés <i>et al.</i> 2002 [42] | At            | Human             | BV, EpLV        | 14-iCine-MRI(8-10)         | M                             |                                                           |                   |                          |                    |                | MBS-TCM       |                     |
| Frangi <i>et al.</i> 2002 [51]         | At + Stat     | Human             | BV, EpLV        | 14-iMRI(10mm)              | M                             | sFEMt(x)                                                  |                   |                          |                    |                | MBS           |                     |
| Kerckhoffs <i>et al.</i> 2003 [6]      | Geom          |                   | LV              |                            |                               | EP - vFEMh(10e3el,11e3n,2mm)<br>Mec - vFEMh(108el,3.2e3n) | RBM               | AP(4), Dur               |                    |                | EM            |                     |
| Stevens <i>et al.</i> 2003 [13]        | Anat          | Pig               | BV              | ExpM                       |                               | vFEM-H(79el)                                              | DExp(SH)          |                          |                    |                | Mec           |                     |
| Sermesant <i>et al.</i> 2003 [76]      | IM, Def       | Dog               | BV              | eDT-MRI                    | SA2D: CM                      | vFEMt(10e3el,2e3n)                                        | DTI(DH)           |                          |                    | LAR            | MBS           |                     |
| Lötjönen <i>et al.</i> 2004 [55]       | At + Stat     | Human             | WH, EpV         | 25-iMRI(6-7mm)             | M                             | sFEMt(x)                                                  |                   |                          | Pap                |                | MBS           |                     |
| Helm <i>et al.</i> 2005 [30]           | IM            | Dog               | BV              | eDT-MRI(0.8mm)             | SA2D: SN                      | vFEM-H(24el)                                              | DTI(SH)           |                          |                    |                |               |                     |
| Haddad <i>et al.</i> 2005 [37]         | IM, PS, Dyn   | Human             | WH, GCV, pCT    | iMRI(2mm), iCine-MRI(7mm)  | WH - M pCT - SA2D             | sFEMt(x)                                                  |                   |                          |                    | MCC            |               |                     |
| Perperidis <i>et al.</i> 2005 [54]     | At, Dyn       | Human             | BV, EpLV        | 26-iCine-MRI(10mm)         | M + Reg                       | sFEMt(x)                                                  |                   |                          | Pap                | MCC            | O             |                     |
| Bodin & Kuz'min, 2006 [20]             | CAD           | Human             | WH, OE, GCV     | O                          |                               | sFEMt(x)                                                  |                   |                          |                    |                | EP            |                     |
| Seemann <i>et al.</i> 2006 [24]        | Anat          | Human             | A               | pHS-VHP                    | SA2D: RG, SN                  | vFEMh(1.58e6el)                                           |                   | SAN, Atr                 | Pec, FO            |                | EP            |                     |
| Appleton <i>et al.</i> 2006 [38]       | IM, PS, Dyn   | Human             | BV              | iCine-MRI(9)               | A2D: CM, SN                   | CA(40e3)                                                  |                   | HPS                      |                    | MCC(20)        | EP            |                     |
| Yang <i>et al.</i> 2006 [40]           | IM, PS        | Human             | WH, OE          | iMS-CT(1mm)                | SA2D: SN, LS                  |                                                           |                   |                          |                    |                |               |                     |
| Burton <i>et al.</i> 2006 [44]         | IM, HD        | Rabbit            | BV, fCT         | eMRI(24.4μm), pHS-St(10μm) | MRI - SA2D: CM pHS - A2D: CTS | vFEM                                                      | IM3D(SH)          |                          | Pap, TC            | LT             | EP            |                     |

**Table S1 (part 1).** The main features of the sixty reviewed 3D cardiac computational models and the methods used for its development

| MODEL                                 | Kind of model                          | Species (anatomy)           | Model extension    | Anatomical information        | Segmentation method                     | Meshing                                                        | Fibre orientation           | CCS                              | Endocardium detail | Other features         | Model purpose    | Online availability |
|---------------------------------------|----------------------------------------|-----------------------------|--------------------|-------------------------------|-----------------------------------------|----------------------------------------------------------------|-----------------------------|----------------------------------|--------------------|------------------------|------------------|---------------------|
| Sermesant <i>et al.</i> 2006 [7]      | Geom, Def                              | Human                       | BV                 |                               |                                         | vFEMt(20e3el,4e3n)                                             | DTI(DH)                     |                                  |                    | LAR                    | Mec, MBS         |                     |
| Lorenz & von Berg, 2006 [56]          | At + Stat                              | Human                       | WH, EpLV, GCV, pCT | 27-iMS-CT(0.5mm)              | SA3D: Fit                               | sFEMt(x)                                                       |                             |                                  |                    |                        | MBS              | AMDB                |
| Sermesant <i>et al.</i> 2006 [160]    | (1) Anat, Def, Dyn<br>(2) IM, Def, Dyn | Dog                         | BV                 | (1) ExpM<br>(2) eDT-MRI(x)    | SA2D: CM                                | vFEMt(40e3el,7e3n)                                             | (1) Lit(Dog)<br>(2) DTI(DH) | AP, Dur                          |                    | LAR                    | EP, Mec, MBS-TCM |                     |
| Trunk <i>et al.</i> 2007 [17]         | Anat                                   | Human                       | WH, GCV, pCT       | pHS-VHP                       | M                                       | Vox(1mm)                                                       |                             |                                  |                    |                        | O                |                     |
| Ordas <i>et al.</i> 2007 [43]         | At                                     | Human                       | WH, pCT            | 100-iMS-CT(2mm)               | A3D: Reg                                | vFEMt(0.5mm)                                                   | RBM                         | Atr, HPS, AK(Human)              |                    | LAR, TH                | EP               | AMDB                |
| Peyrat <i>et al.</i> 2007 [77]        | At                                     | Dog                         | WH                 | 9-eMRI                        |                                         |                                                                | DTI(SH)                     |                                  |                    |                        |                  | 2, AMDB             |
| Arevalo <i>et al.</i> 2008 [31]       | IM                                     | Dog                         | WH                 | eMRI(0.8mm)                   | SA2D: CM, RG, LS                        | vFEMt<br>(29e6el,5e6n,0.4mm)                                   | DTI(SH)                     |                                  | Pap, TC            | ISC                    | EP               |                     |
| Plotkowiak <i>et al.</i> 2008 [32]    | IM                                     | Rabbit                      | BV                 | eMRI(24.4µm)                  | A2D: LS                                 | vFEMt(3.7e6el,83e4n)                                           |                             |                                  | Pap                |                        | EP               |                     |
| Ecabert <i>et al.</i> 2008 [47]       | At + Def, Stat                         | Human                       | WH, EpLV, GCV      | 28-iMS-CT<br>(0.67-3mm)       | SA3D: Fit                               | sFEMt<br>(14.7e3el,7.3e3n,2.5-5mm)                             |                             |                                  |                    |                        | MBS              | AMDB                |
| Ruiz-Villa <i>et al.</i> 2009 [21]    | CAD                                    | Human                       | A                  | ML                            |                                         | vFEMh(51e3el,1e5n)                                             | Lit(Human)                  | Atr                              | Pec, FO            | LAD                    | EP               |                     |
| Niederer <i>et al.</i> 2009 [39]      | IM, PS                                 | Human                       | BV                 | iMRI(x)                       | M                                       | vFEM-H(112el,183n)                                             | Lit(Dog)                    |                                  |                    |                        | Mec              |                     |
| Plank <i>et al.</i> 2009 [45]         | IM, HD                                 | (1) Rabbit<br>(2) Rat       | BV                 | eMRI(24.4µm),<br>pHS-St(10µm) | MRI - SA2D: LS, CM<br>pHS-A3D: Reg(MRI) | (1) vFEMt<br>(24e6el,4.3e6n,125µm)                             | (1) RBM<br>(2) DTI(SH)      |                                  | Pap, TC            | LAR                    | EP               |                     |
| Vadakkumpadan <i>et al.</i> 2009 [53] | IM, HD                                 | Rabbit                      | BV, fCT            | eMRI(24.5µm)                  | SA2D: CM, RG, LS                        | vFEMx(31e6el,50µm)                                             | DTI(SH)                     | Purk, hrMRI                      | Pap, TC            | ISC                    | EP               |                     |
| Heidenreich <i>et al.</i> 2010 [33]   | IM                                     | Human                       | BV                 | eDT-MRI(0.8mm)                | M <sup>11</sup>                         | vFEMh<br>(1.3e6el,1.4e6n,0.4mm)                                | DTI(SH)                     | HPS                              |                    | RVD, TH                | EP               |                     |
| Romero <i>et al.</i> 2010 [41]        | IM, PS                                 | Human                       | BV                 | iMS-CT(x)                     | A3D: MBS                                | vFEMt(15-21e6el,2.5-3.5e6n,>0.5mm)                             | RBM                         | Purk, Dur                        |                    | LVH, LVD<br>(3 models) | EP               |                     |
| Bishop <i>et al.</i> 2010 [46]        | IM, HD                                 | Rabbit                      | BV, fCT, FAn       | eMRI(24.4µm)                  | SA2D: LS                                | vFEMt<br>(41.5e6el,7e6n,125µm)                                 | RBM                         |                                  | Pap, TC, CTen      | LAR                    | EP               | 3                   |
| Wenk <i>et al.</i> 2010 [50]          | IM                                     | Sheep                       | LV, FAn            | iMRI(x), pHD                  |                                         | vFEMh(x)                                                       | Lit(Dog)                    |                                  | Pap, CTen          | ISC                    | Mec              |                     |
| Gurev <i>et al.</i> 2011 [34]         | IM                                     | Dog,<br>Human<br>(3 models) | BV                 | eMRI(x)                       | SA2D: CM, RG, LS                        | EP - vFEMx<br>(1.7e6el,1.4e6n)<br>Mec - vFEM-H<br>(172el,356n) | DTI(SH)                     | AP, Dur                          |                    |                        | EM               |                     |
| Deng <i>et al.</i> 2012 [35]          | IM                                     | Human                       | WH                 | eCT(531,0.33mm)               | SA2D: CM, RG                            |                                                                | DExp(SH)                    | SAN, Atr, AVN, HPS,<br>AK(Human) | Pec, FO            |                        | EP               |                     |
| Zhao <i>et al.</i> 2013 [25]          | Anat, HD                               | Sheep                       | A                  | pHS(50µm)                     | SA2D: CM, RG                            | vFDG(0.1mm)                                                    | IM3D(SH)                    | SAN, Atr                         | Pec, CT            |                        | EP               |                     |
| Aslanidi <i>et al.</i> 2013 [36]      | IM, HD                                 | Dog                         | A                  | eMicro-CT(36µm)               | SA2D                                    |                                                                | eMicro-CT(SH)               | AVN, Atr                         | Pec                |                        |                  |                     |
| Hoogendoorn <i>et al.</i> 2013 [52]   | At + Stat, Dyn                         | Human                       | WH, EpLV, GCV, pCT | 138-iMS-CT(2mm)               | A3D: Reg                                | sFEMt(16e3n)                                                   |                             |                                  |                    | LAR,<br>MCC(15)        | MBS-TCM, O       | 4                   |

**Table S1 (part 2).** The main features of the sixty reviewed 3D cardiac computational models and the methods used for its development

**AMDB:** Anatomical Model Database (see ref. [187]). <http://amdb.isd.kcl.ac.uk:8080/AMDBWebInt/>

1: <http://cmrg.ucsd.edu/>

2: <https://team.inria.fr/asclepios/data/>

3: <https://chaste.cs.ox.ac.uk/trac/browser/data/public>

4: [http://www.cistib.org/cistib\\_shf/index.php/translation/downloads](http://www.cistib.org/cistib_shf/index.php/translation/downloads)

| Kind of model          |                                                                                                     | General                   |                                                                                                                           |
|------------------------|-----------------------------------------------------------------------------------------------------|---------------------------|---------------------------------------------------------------------------------------------------------------------------|
| Geom                   | Geometrical shape-based model (ellipsoid-based)                                                     | x                         | Feature not included or Method not reported                                                                               |
| SAnat                  | Simple anatomical model                                                                             | O                         | Other options                                                                                                             |
| IM                     | Image-based model                                                                                   | Meshing                   |                                                                                                                           |
| PS                     | Patient-specific model                                                                              | CA(n,mm)                  | Cellular automaton. n: number of cells. mm: spatial resolution.                                                           |
| CAD                    | CAD model                                                                                           | sFEM-t(el,n,mm)           | Surface finite element mesh with triangular elements. el: number of elements. n: number of nodes. mm: spatial resolution. |
| Def                    | Deformable model                                                                                    | vFEM-h(el,n,mm)           | Volumetric finite element mesh with hexahedral elements                                                                   |
| Stat                   | Statistical cardiac model                                                                           | vFEM-t(el,n,mm)           | Volumetric finite element mesh with tetrahedral elements                                                                  |
| At                     | Cardiac atlas                                                                                       | sFEM-H(el,n,mm)           | Surface finite el. mesh based on cubic Hermite basis functions                                                            |
| Dyn                    | Dynamic model                                                                                       | vFEM-H(el,n,mm)           | Volumetric finite el. mesh based on cubic Hermite basis functions                                                         |
| HD                     | High level of anatomical detail                                                                     | vFDG(mm)                  | Volumetric finite difference grid. mm: spatial resolution.                                                                |
| LD                     | Low level of anatomical detail                                                                      | Vox(mm)                   | Voxels-based volumetric model (not FEM). mm: spatial resolution.                                                          |
| Model extension        |                                                                                                     | Fibre orientation         |                                                                                                                           |
| LV                     | Left ventricle model                                                                                | RBM                       | By a rule-based method based on Streeter's findings                                                                       |
| BV                     | Bi-ventricle model                                                                                  | DTI                       | From <i>ex-vivo</i> DTI images                                                                                            |
| A                      | Bi-atrial model                                                                                     | SH                        | From the same heart used for the anatomical reconstruction                                                                |
| WH                     | Whole heart model                                                                                   | DH                        | From a different heart than used for the anatomical reconstruction                                                        |
| GCV                    | Great cardiac vessels                                                                               | DExp                      | From direct experimental measurements                                                                                     |
| pCT                    | Part of coronary tree                                                                               | Lit(sp)                   | Taken from the literature. sp: species                                                                                    |
| fCT                    | Full coronary tree                                                                                  | IM3D                      | From the volumetric image assembled from histological slices                                                              |
| OE                     | Only endocardium                                                                                    | Cardiac conduction system |                                                                                                                           |
| OEp                    | Only epicardium                                                                                     | AP(n)                     | CCS emulated by activation points on the endocardial surfaces. n: number of activations points                            |
| EpLV                   | Only epicardium for LV                                                                              | Dur                       | From the activation maps obtained by Durrer <i>et al.</i> 1970                                                            |
| EpV                    | Only epicardium for ventricles                                                                      | HPS                       | His-Purkinje fibres                                                                                                       |
| FAn                    | Fibrous annulus of atrio-ventricular valves                                                         | AVN                       | AV (atrio-ventricular) node                                                                                               |
| Anatomical information |                                                                                                     | SAN                       | SN (sino-atrial) node                                                                                                     |
| ExpM                   | Experimental measurements taken on explanted hearts                                                 | Purk                      | Only Purkinje fibres                                                                                                      |
| ML                     | Measurements taken from the literature                                                              | AK(sp)                    | From the anatomical knowledge. sp: species                                                                                |
| pHD                    | Pictures of heart dissections                                                                       | N-PMJ                     | Purkinje-muscle junctions. N: number of PMJs                                                                              |
| HS(n,mm)               | Histo-anatomical slices. n: number of slices. mm: slice thickness.                                  | Atr                       | Atrial conduction bundles: crista terminalis, Bachmann's bundle and pectinate muscles                                     |
| pHS(n,mm)              | Pictures of histo-anatomical slices                                                                 | hrMRI                     | Free-running Purkinje fibres from high-resolution <i>ex-vivo</i> MRI                                                      |
| pHS-St(n,mm)           | Pictures of histo-anatomical slices with special staining                                           | Endocardium detail        |                                                                                                                           |
| eMRI(n,mm)             | <i>Ex-vivo</i> MRI                                                                                  | Pap                       | Papillary muscles                                                                                                         |
| iMRI(n,mm)             | <i>In-vivo</i> MRI                                                                                  | TC                        | Trabeculae carnae                                                                                                         |
| N-iMRI(n,mm)           | <i>In-vivo</i> MRI. N: population size (for atlases)                                                | Pec                       | Pectinate muscles                                                                                                         |
| eCT(n,mm)              | <i>Ex-vivo</i> CT                                                                                   | CT                        | Crista terminalis                                                                                                         |
| iCT(n,mm)              | <i>In-vivo</i> CT                                                                                   | FO                        | Fossa ovalis                                                                                                              |
| N-iCT(n,mm)            | <i>In-vivo</i> CT                                                                                   | CTen                      | Chordae tendineae                                                                                                         |
| VLV                    | <i>In-vivo</i> ventriculography of the LV (cine-angio-cardiography)                                 | Other features            |                                                                                                                           |
| Segmentation method    |                                                                                                     | LAR                       | Labelling of anatomical regions                                                                                           |
| MD                     | Manually drawn                                                                                      | TH                        | Electrophysiological transmural heterogeneity in ventricular wall                                                         |
| M                      | Manual segmentation                                                                                 | RVH                       | RV hypertrophy                                                                                                            |
| SA2D                   | Semi-automatic 2D (slice by slice), with some manual interaction                                    | LVH                       | LV hypertrophy                                                                                                            |
| A2D                    | Automatic 2D, without any manual interaction                                                        | LVD                       | LV dilation                                                                                                               |
| SA3D                   | Semi-automatic 3D segmentation, with some manual interaction                                        | LAD                       | Left atrium dilation                                                                                                      |
| A3D                    | Automatic 3D segmentation, without any manual interaction                                           | ISC                       | Infarct-derived ischemic scar in LV, including core and border zone                                                       |
| CM                     | Classical image processing methods ( <i>thresholding, edge detection, morphological op., etc.</i> ) | MCC(n)                    | Motion due to the cardiac cycle. n: number of phases                                                                      |
| CTS                    | Colour-thresholding segmentation                                                                    | LT                        | Labelling of tissues (histological information)                                                                           |
| RG                     | Region growing                                                                                      | Model purpose             |                                                                                                                           |
| SN                     | Snakes                                                                                              | MA                        | Mechanical analysis                                                                                                       |
| LS                     | Level sets                                                                                          | EP                        | Simulation of cardiac electrophysiology                                                                                   |
| MBS                    | Model-based segmentation                                                                            | EM                        | Simulation of cardiac electro-mechanics                                                                                   |
| Reg                    | Registration with a previously manually segmented image                                             | Mec                       | Simulation of cardiac mechanics                                                                                           |
| Fit                    | Fitting an initial mesh to the target image                                                         | MBS                       | Model-based segmentation                                                                                                  |
|                        |                                                                                                     | MBS-TCM                   | Model-based segmentation with tracking of cardiac motion                                                                  |

**Table S2.** List of acronyms used in the table of reviewed 3D cardiac computational models (Table S1)

## Content of Table S1

First column in Table S1, named "*Kind of model*", corresponds to a proposed classification based on the level of anatomical realism achieved by the model and the method used for the 3D reconstruction of the cardiac anatomy.

Second column, called "*Species (anatomy)*", specifies the animal species whose anatomy is modelled.

Under the heading "*Model extension*" the cardiac chambers and structures included in each model are detailed.

Next two columns provide information about the source of the "*Anatomical information*" and the "*Segmentation method*" (for image-based models) used to build each model, respectively.

The column labelled as "*Meshing*" shows the approach used to generate the 3D computational model from the reconstructed cardiac geometry and, if reported, some details such as mesh resolution.

"*Fibre orientation*" and "*CCS*" (cardiac conduction system) columns report whether or not these features are included in the model and, if so, the approach used to include them.

"*Endocardium detail*" column gives information about the level of anatomical detail achieved in the reconstructed endocardial surfaces, both in ventricles and atria.

Next column, named "*Other features*", collects miscellaneous information, such as the inclusion in the model of ischaemic scars, some kind of anatomical variation, labelling of interesting anatomical regions, etc.

"*Model purpose*" column specifies the final application for which each model was originally developed.

The last column, "*Online availability*", reports whether the model is available online, providing the link if so.
